# Supplementary material for: Scleraxis is required for the growth of adult tendons in response to mechanical loading
Source: JCI journal article supplement (doi:10.1172/jci.insight.138295), 2020-05-28
Supplement: sd1 [file 1]

## Supplemental Material

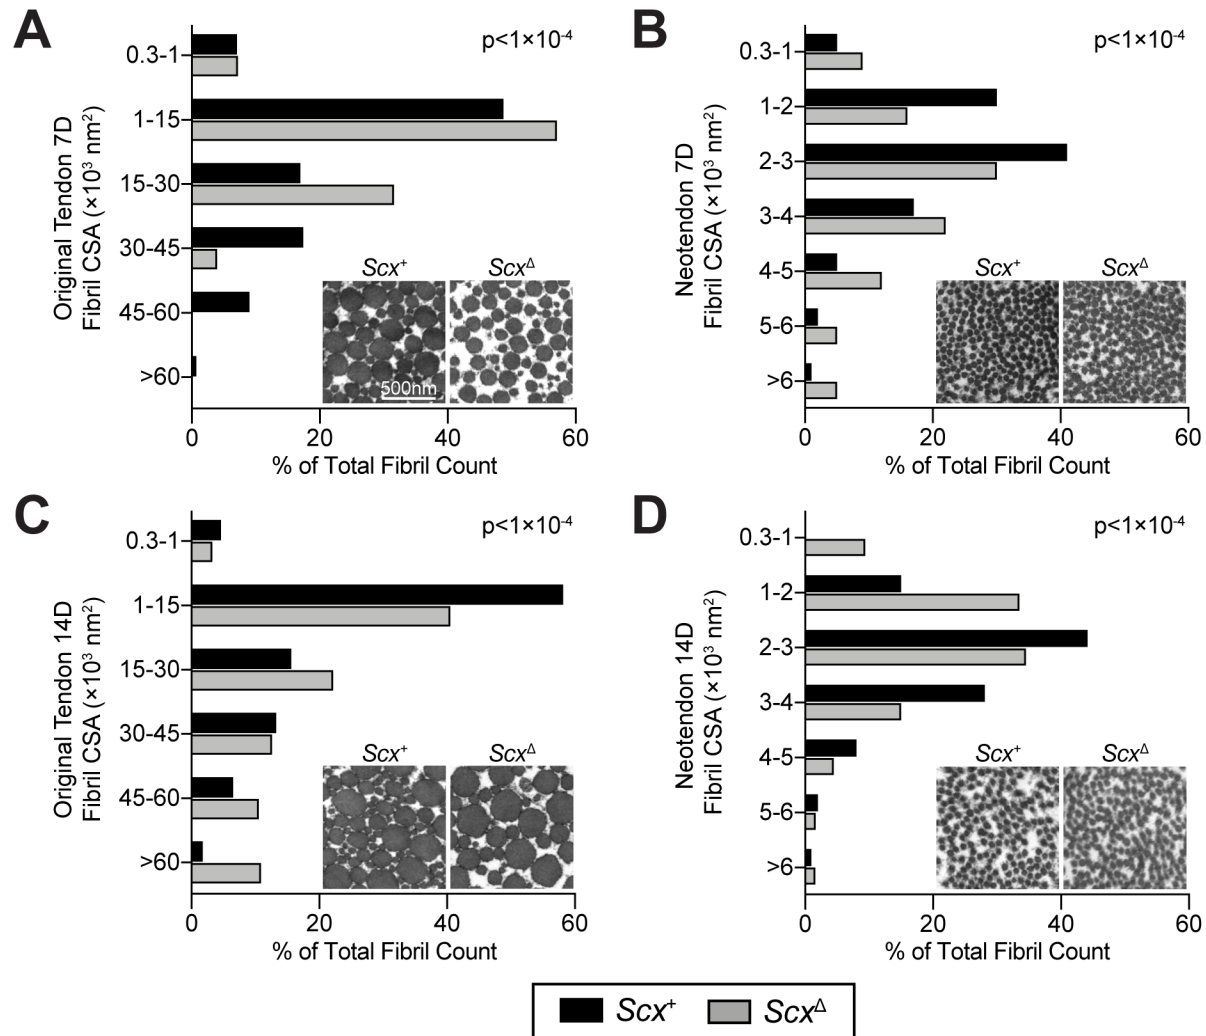

**Supplemental Figure 1. Effect of scleraxis deletion on tendon collagen fibril size distributions.** Quantification of collagen fibril cross-sectional area (CSA) measurements, from transmission electron micrographs of  $Scx^+$  and  $Scx^\Delta$  (A, C) original tendons or (B, D) neotendons at either (A, B) 7D or (C, D) 14D after synergist ablation/plantar growth procedure. Fibril counts are expressed as percentage of total fibril abundance. Scale bar for all images is 500nm. Differences between the distribution of  $Scx^+$  and  $Scx^\Delta$  fibrils for each time point and tendon area were tested using the Chi-squared test ( $p < 0.05$ ).  $N \geq 2$  mice per group.

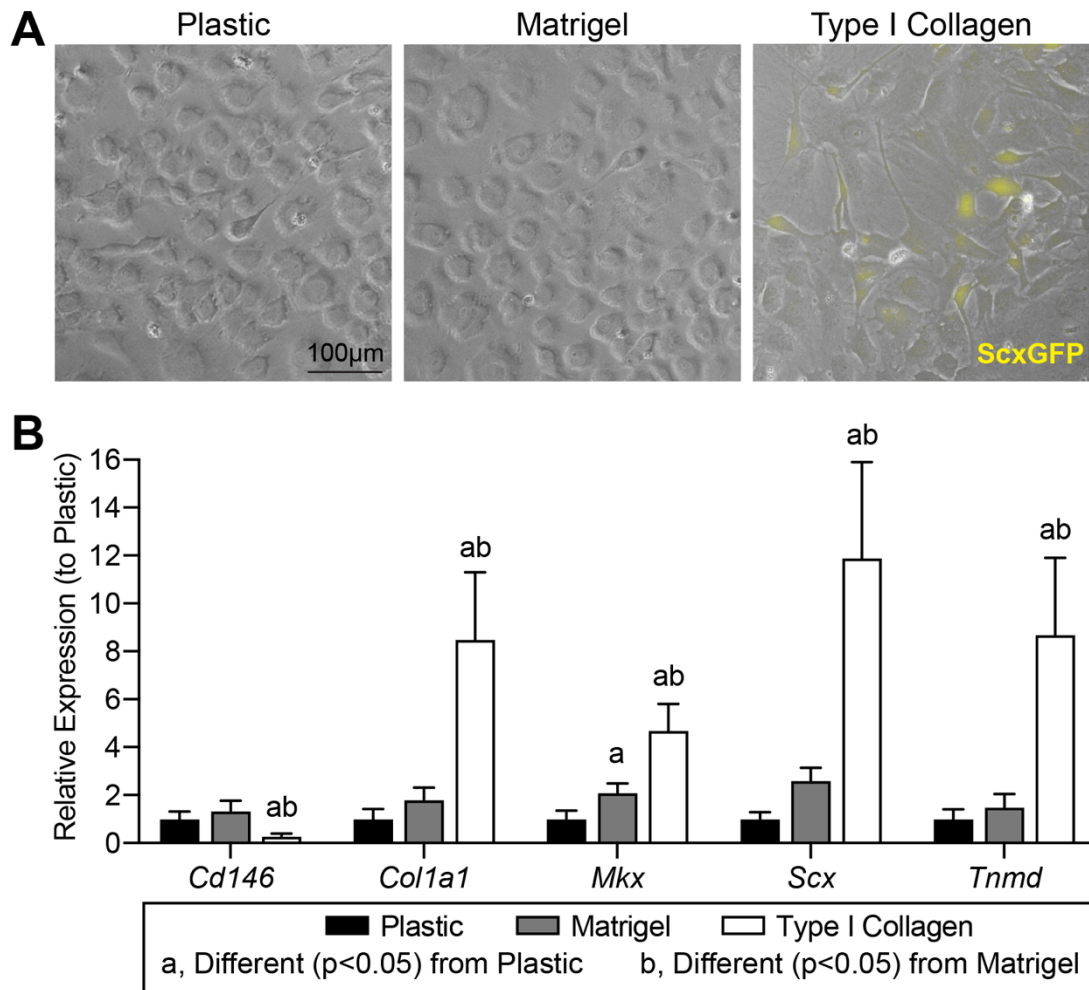

**Supplemental Figure 2. Effect of matrix substrate on pericyte differentiation.** (A) CD146<sup>+</sup> pericytes from *ScxGFP* mice were cultured on plastic, or on thin gels of Matrigel or type I collagen, for 5 days. Fluorescent images demonstrate GFP expression (driven by scleraxis, shown in yellow), with phase contrast overlay. Scale bar for all images is 100µm. (B) Gene expression of pericytes placed on different culture substrates for 5 days. Values are mean±SD. Differences between groups were tested using a two-way ANOVA: a, significantly different ( $p < 0.05$ ) from Plastic; b, significantly different ( $p < 0.05$ ) from Matrigel. N=6 replicates per group.
